# Supplementary material
Source: PubMed Central journal article supplement (PMC6016814)
Supplement: pnas.1800028115.sapp.pdf [file pnas.1800028115.sapp.pdf]

## Supplementary information

*Belonging to:*

*Mackenbach, J.P. et al. Health inequalities before and after the financial crisis: trend study of 27 European countries.*

*Version 040418*

Contents:

Figure S1. Changes in crisis-related indicators, 2005-2007 vs. 2010-2012

Figure S2. Trends in all-cause mortality by education, women, ca. 1980-ca. 2014

Figure S3. Trends in inequalities in less-than-good self-assessed health and activity limitations

Figure S4. Trends in less-than-good self-assessed health among men in five crisis countries, by education

Figure S5. Changes between the early 2000s and early 2010s in cause-specific mortality, by country, sex and education

Table S1. Overview of the mortality data sources

Table S2. ICD-codes for the causes of death included in the analysis

Table S3. Overview of the survey data

Table S4. Comparison of trends in mortality and mortality inequalities between regional data for Barcelona and national data for Spain as a whole

Table S5. Results of interrupted time-series analysis of mortality

Table S6. Results of interrupted time-series analysis of less-than-good self-assessed health and activity limitations

Table S7. Relationship between crisis-related variables and mortality, less-than-good self-assessed health and activity limitations, by education, women

Box S1. Details on the regression analyses

Box S2. Acknowledgements relating to data acquisition

Figure S1. Changes in crisis-related indicators, 2005-2007 vs. 2010-2012

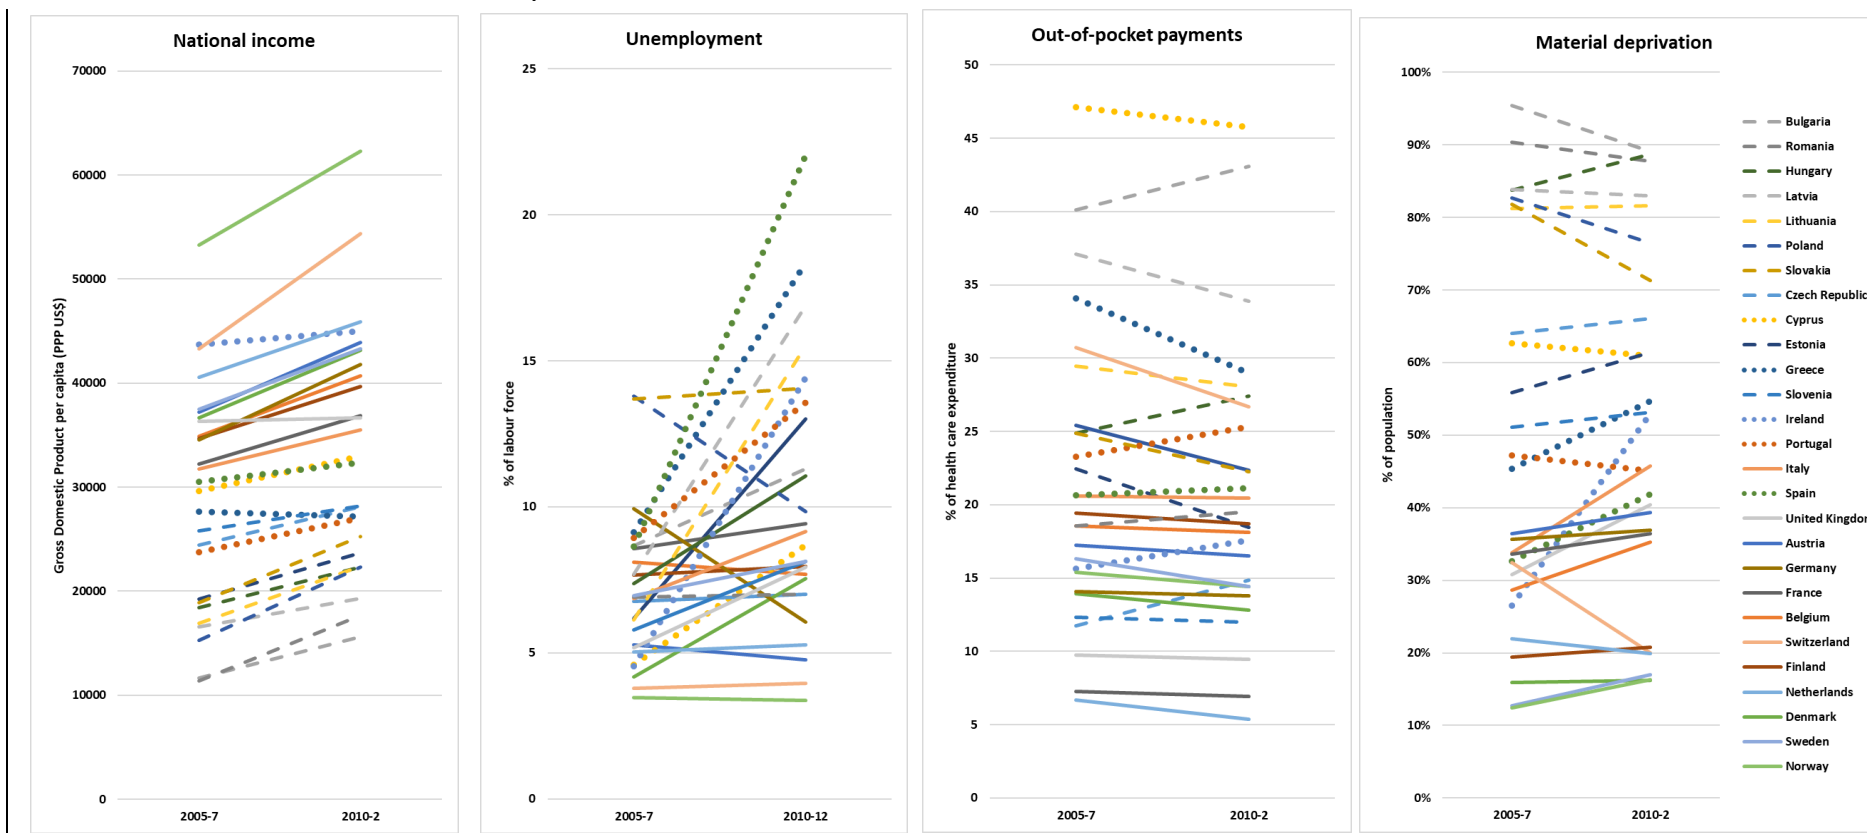

Lines connect average values for 2005-2007 and 2010-2012. Dashed lines: Eastern Europe. Dotted lines: five Western European countries most severely hit by the crisis. Definition of material deprivation: see Data and methods section. Percentage of population with material deprivation applies to low educated men only.

Figure S2. Trends in all-cause mortality by education, women, ca. 1980-ca. 2014

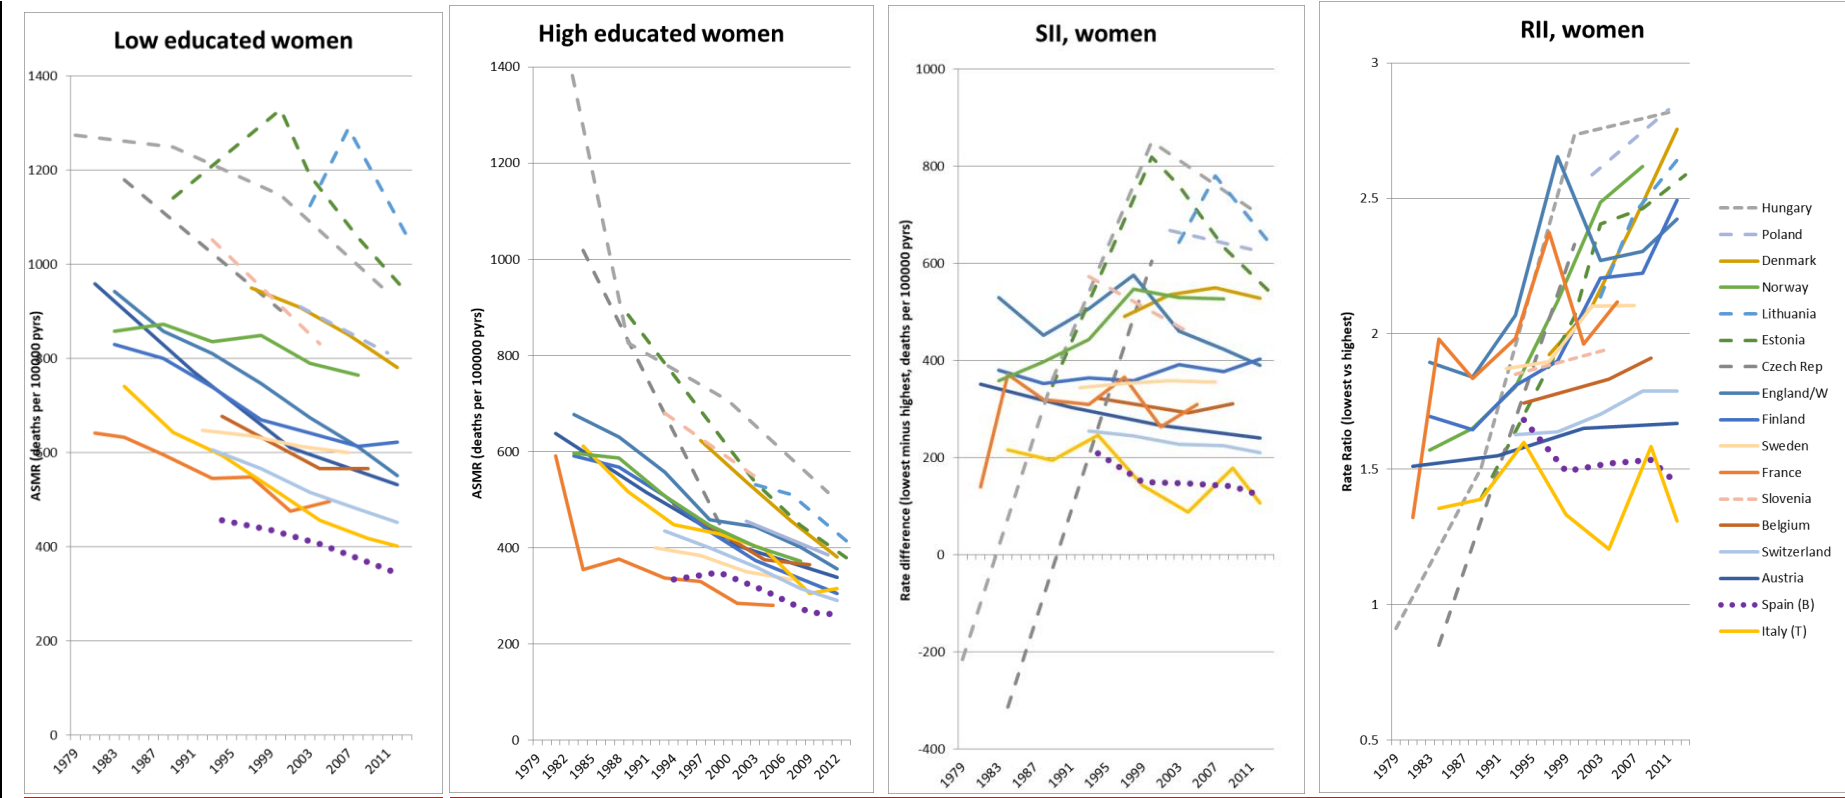

Dashed lines: Eastern Europe. Dotted line: Western European country most severely hit by the economic crisis. SII = Slope Index of Inequality. RII = Relative Index of Inequality. ASMR = age-standardized mortality rate.

Figure S3. Trends in inequalities in less-than-good self-assessed health and activity limitations.

a. Self-assessed health

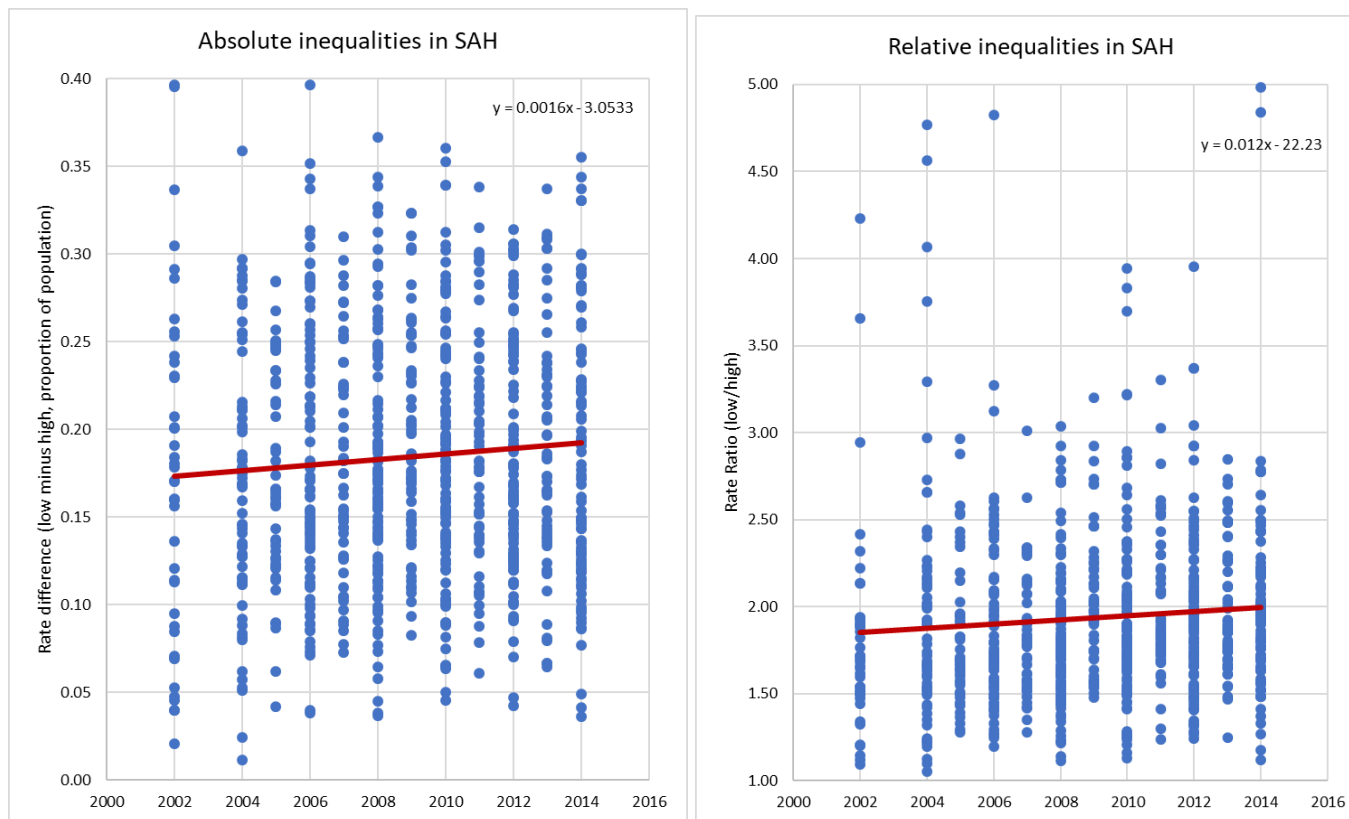

b. GALI limitations

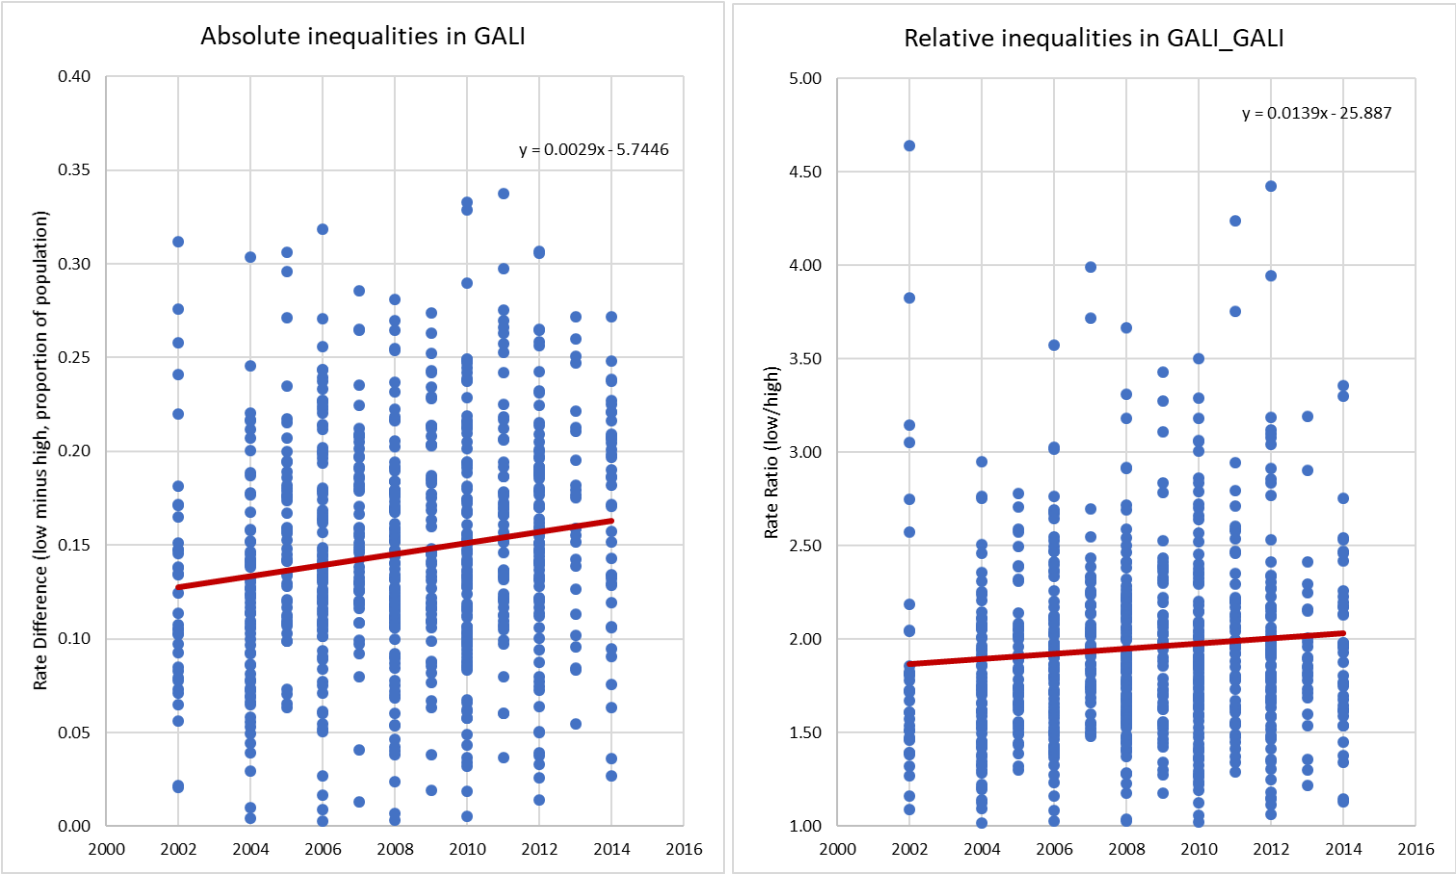

RD = Rate Difference. RR = Rate Ratio. The red line represents a simple linear regression line of the RD or RR on calendar-year. Pooled data for men and women and two surveys (ESS and EU-SILC).

**Figure S4. Trends in less-than-good self-assessed health among men in five crisis countries, by education**

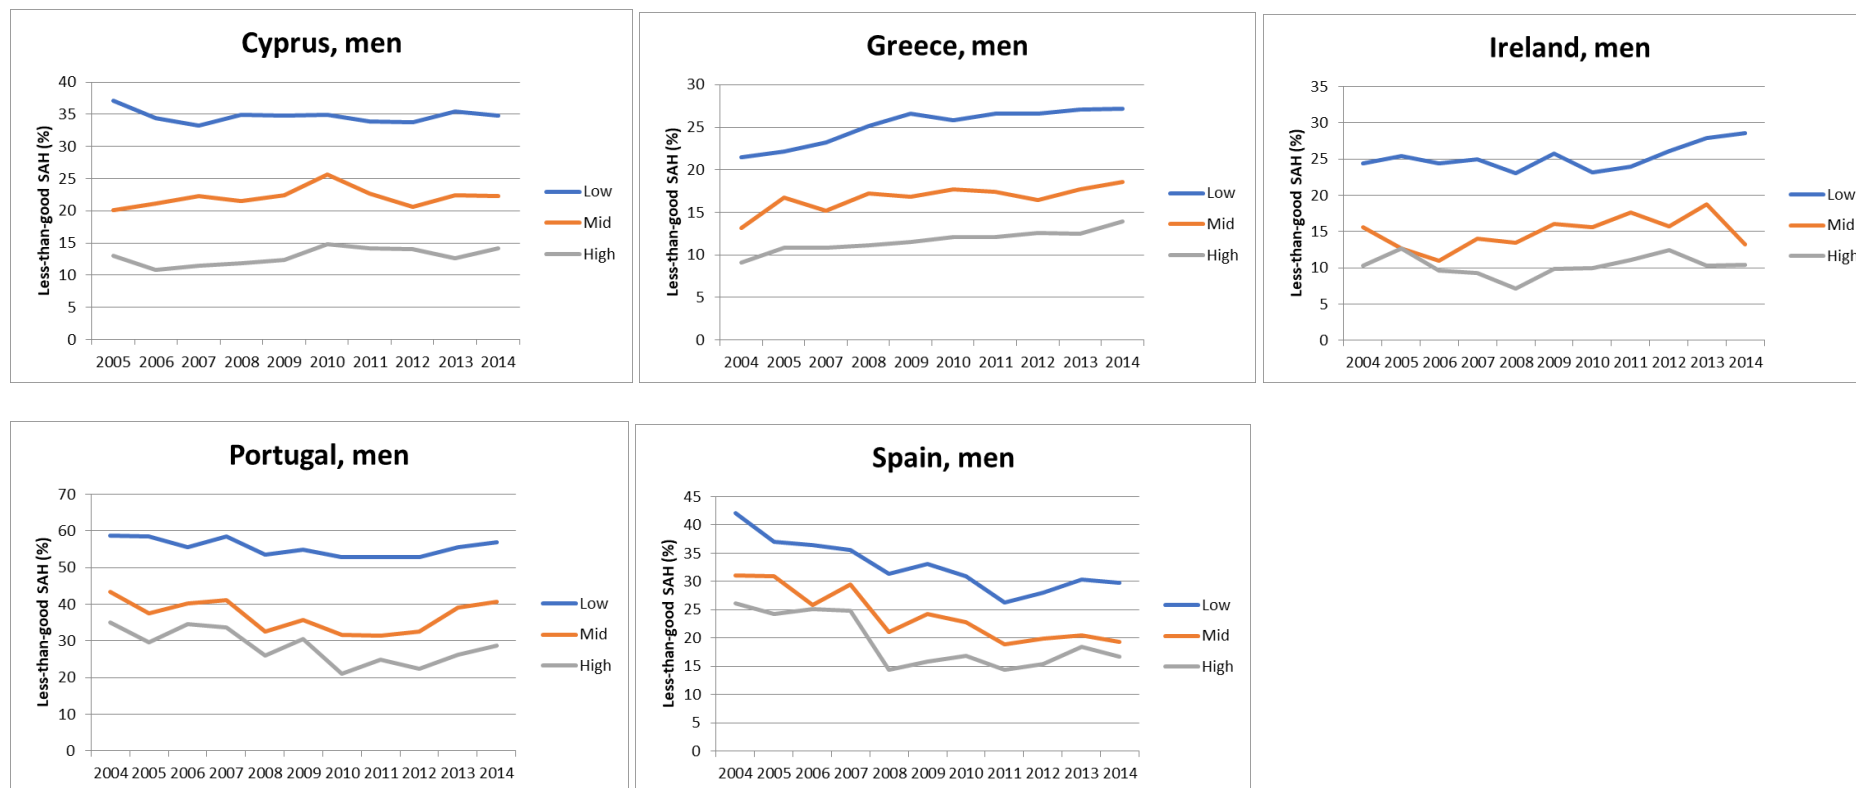

Age-standardized prevalence of less-than-good self-assessed health as reported in EU-SILC.

Figure S5. Changes between the early 2000s and early 2010s in cause-specific mortality, by country, sex and education.

a. Men

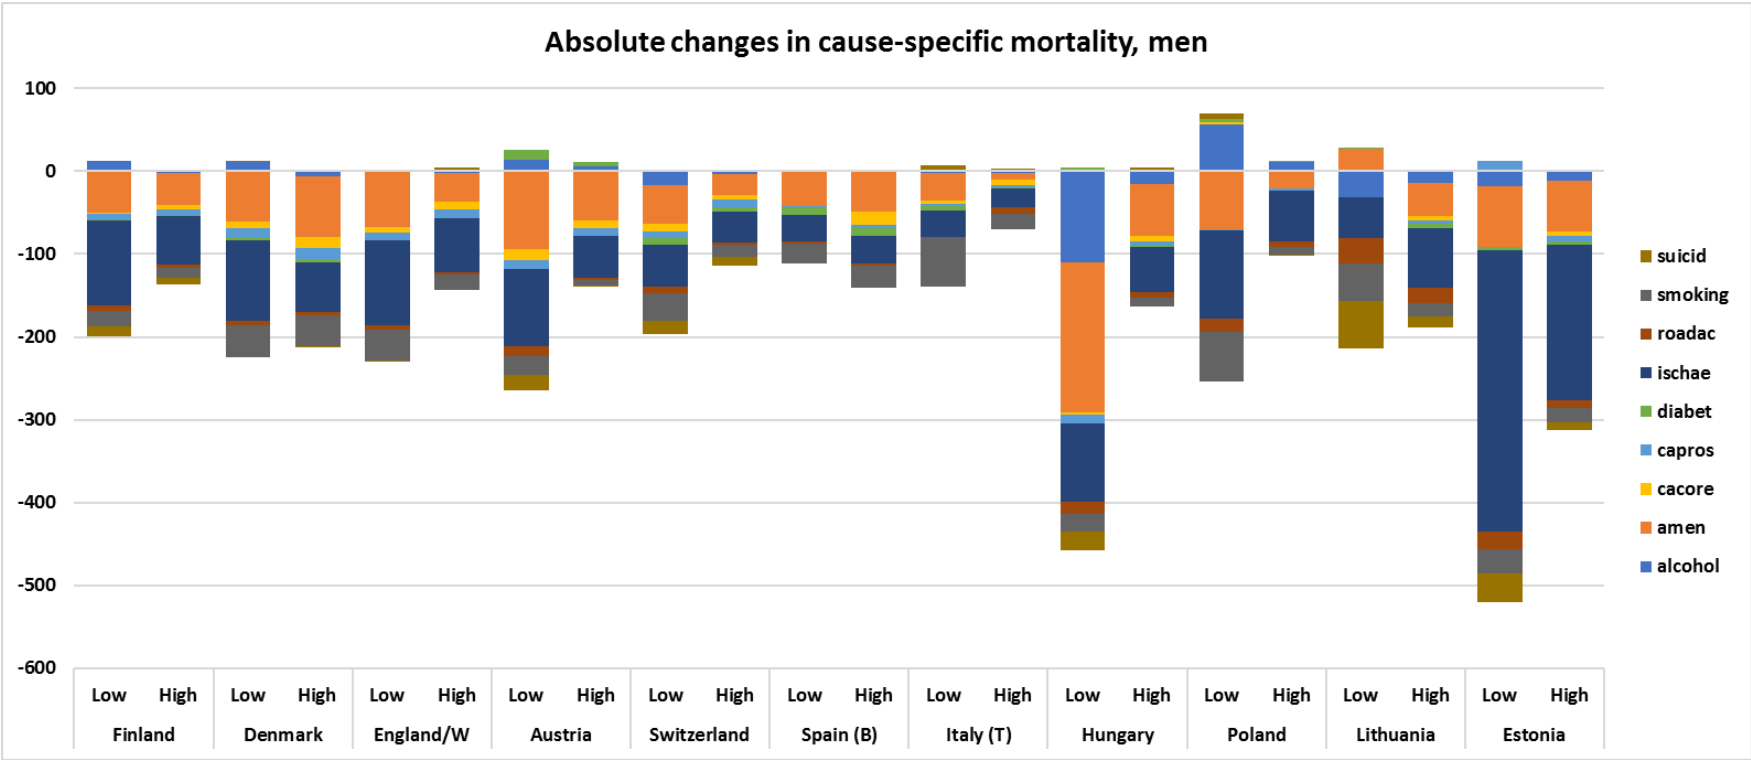

b. Women

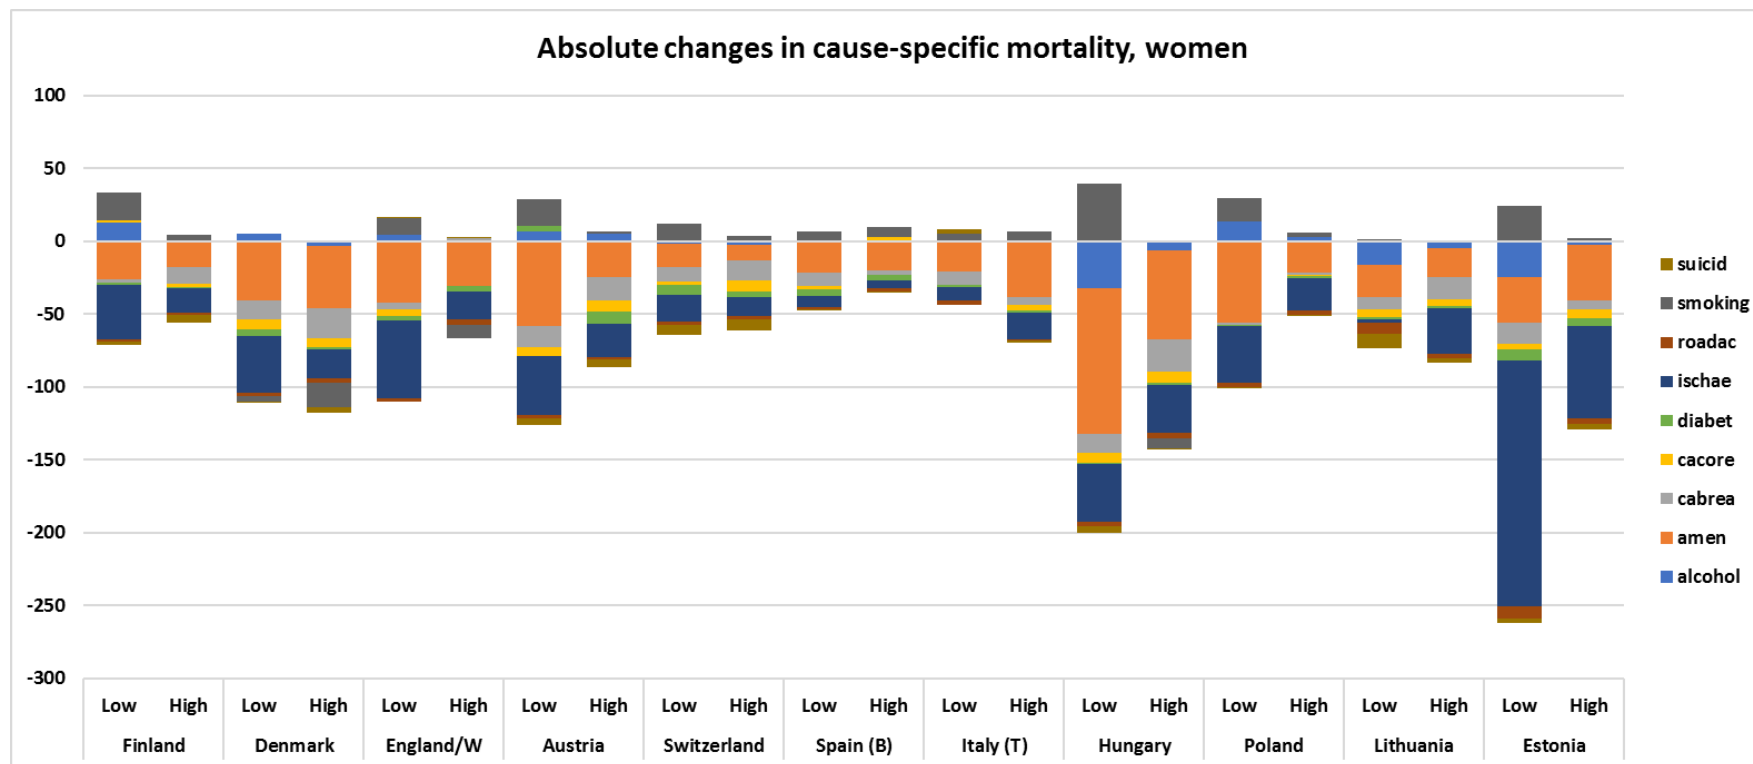

Notes: suicide = suicide, smoking = smoking-related causes, roadacc = road traffic injuries, ischae = ischemic heart disease, diabet = diabetes mellitus, cacore = colorectal cancer, cabrea = breast cancer, amen = causes of death amenable to medical intervention, alcohol = alcohol-related causes of death. For ICD code numbers, see table S2.







**Table S2. ICD-codes for the causes of death included in the analysis**

|                                                                                                                                                                                                                                                                                                                                                                                                                                                                                                                                | ICD-10 codes                                                                                                                                                                                     |
|--------------------------------------------------------------------------------------------------------------------------------------------------------------------------------------------------------------------------------------------------------------------------------------------------------------------------------------------------------------------------------------------------------------------------------------------------------------------------------------------------------------------------------|--------------------------------------------------------------------------------------------------------------------------------------------------------------------------------------------------|
| <b>Total mortality, all causes</b>                                                                                                                                                                                                                                                                                                                                                                                                                                                                                             | A00-Y98                                                                                                                                                                                          |
| <b>Cardiovascular diseases</b>                                                                                                                                                                                                                                                                                                                                                                                                                                                                                                 | <b>I00-I99</b>                                                                                                                                                                                   |
| <b>Cancer</b>                                                                                                                                                                                                                                                                                                                                                                                                                                                                                                                  | <b>C00-D48</b>                                                                                                                                                                                   |
| <b>Other diseases</b>                                                                                                                                                                                                                                                                                                                                                                                                                                                                                                          | <b>Rest (A00-U85)</b>                                                                                                                                                                            |
| <b>External causes</b>                                                                                                                                                                                                                                                                                                                                                                                                                                                                                                         | <b>V01-Y98</b>                                                                                                                                                                                   |
| <i>Smoking-related causes*</i>                                                                                                                                                                                                                                                                                                                                                                                                                                                                                                 | C33-C34;C32;J40-J44; J47                                                                                                                                                                         |
| <i>Alcohol-related causes**</i>                                                                                                                                                                                                                                                                                                                                                                                                                                                                                                | F10; I42.6; K70; X45                                                                                                                                                                             |
| <i>Amenable causes***</i>                                                                                                                                                                                                                                                                                                                                                                                                                                                                                                      | A15-19, B90; J10-J18; Rest (A00-B99); C53; C62; C18-C21; C81; C91-C95; I60-I69; I00-I09; I10-I15; J45-J46; I98; K35-K38; K40-K46; K56; K80-K83; K25-K28; B20-B24; N40; O00-O99; Q20-Q24; P00-P96 |
| Ischaemic heart disease                                                                                                                                                                                                                                                                                                                                                                                                                                                                                                        | I20-I25                                                                                                                                                                                          |
| Cerebrovascular disease                                                                                                                                                                                                                                                                                                                                                                                                                                                                                                        | I60-I69                                                                                                                                                                                          |
| Stomach cancer                                                                                                                                                                                                                                                                                                                                                                                                                                                                                                                 | C16                                                                                                                                                                                              |
| Colorectal cancer                                                                                                                                                                                                                                                                                                                                                                                                                                                                                                              | C18-C21                                                                                                                                                                                          |
| Cancer of trachea, bronchus and lung                                                                                                                                                                                                                                                                                                                                                                                                                                                                                           | C33-C34                                                                                                                                                                                          |
| Breast cancer                                                                                                                                                                                                                                                                                                                                                                                                                                                                                                                  | C50                                                                                                                                                                                              |
| Prostate cancer                                                                                                                                                                                                                                                                                                                                                                                                                                                                                                                | C61                                                                                                                                                                                              |
| Tuberculosis                                                                                                                                                                                                                                                                                                                                                                                                                                                                                                                   | A15-19, B90                                                                                                                                                                                      |
| Diabetes mellitus                                                                                                                                                                                                                                                                                                                                                                                                                                                                                                              | E10-E14                                                                                                                                                                                          |
| Pneumonia                                                                                                                                                                                                                                                                                                                                                                                                                                                                                                                      | J10-J18                                                                                                                                                                                          |
| Chronic obstructive pulmonary disease                                                                                                                                                                                                                                                                                                                                                                                                                                                                                          | J40-J44; J47                                                                                                                                                                                     |
| Road traffic injuries                                                                                                                                                                                                                                                                                                                                                                                                                                                                                                          | V01-V89, Y85                                                                                                                                                                                     |
| Suicide                                                                                                                                                                                                                                                                                                                                                                                                                                                                                                                        | X60-X84, Y87.0                                                                                                                                                                                   |
|                                                                                                                                                                                                                                                                                                                                                                                                                                                                                                                                |                                                                                                                                                                                                  |
| * Cancer of trachea, bronchus and lung; Cancer of larynx and oropharynx; Chronic obstructive pulmonary disease                                                                                                                                                                                                                                                                                                                                                                                                                 |                                                                                                                                                                                                  |
| ** Alcoholic psychosis, dependence and abuse; Alcoholic cardiomyopathy; Alcoholic cirrhosis of the liver; Accidental poisoning by alcohol                                                                                                                                                                                                                                                                                                                                                                                      |                                                                                                                                                                                                  |
| *** Tuberculosis; Pneumonia/influenza; Other infectious and parasitic diseases; Cancer of cervix uteri; Cancer of testis; Cancer of colon-rectum; Hodgkin's disease; Leukemia; Cerebrovascular disease; Rheumatic heart disease; Hypertension; Asthma; Other heart disease (not listed as Hypertension or Ischaemic heart disease); Appendicitis, hernia, cholecystitis and lithiasis; Peptic ulcer; HIV/AIDS; Prostate hyperplasia; Maternal deaths; Congenital heart disease; Conditions originating in the perinatal period |                                                                                                                                                                                                  |



**Table S4. Comparison of trends in mortality and mortality inequalities between regional data for Barcelona and national data for Spain as a whole.**

| Spain (Barcelona) |           |              |         |      |              |         |      |               |         |     |                           |         |                              |      |         |      |
|-------------------|-----------|--------------|---------|------|--------------|---------|------|---------------|---------|-----|---------------------------|---------|------------------------------|------|---------|------|
|                   |           | Low educated |         |      | Mid educated |         |      | High educated |         |     | Slope Index of Inequality |         | Relative Index of Inequality |      |         |      |
|                   | period    | ASMR         | 95% C.I |      | ASMR         | 95% C.I |      | ASMR          | 95% C.I |     | SII                       | 95% C.I |                              | RII  | 95% C.I |      |
| males             | 1992-1996 | 1163         | 1145    | 1181 | 970          | 936     | 1006 | 784           | 752     | 815 | 600                       | 544     | 656                          | 1,81 | 1,70    | 1,92 |
|                   | 1997-2001 | 1124         | 1106    | 1142 | 959          | 925     | 993  | 754           | 724     | 783 | 571                       | 518     | 624                          | 1,76 | 1,66    | 1,87 |
|                   | 2002-2006 | 1001         | 983     | 1018 | 822          | 795     | 852  | 658           | 633     | 684 | 533                       | 486     | 580                          | 1,84 | 1,74    | 1,95 |
|                   | 2007-2010 | 894          | 875     | 913  | 739          | 711     | 769  | 555           | 531     | 580 | 516                       | 469     | 564                          | 1,95 | 1,82    | 2,09 |
|                   | 2011-2013 | 827          | 806     | 848  | 678          | 649     | 706  | 467           | 443     | 491 | 556                       | 505     | 606                          | 2,18 | 2,01    | 2,37 |
| females           | 1992-1996 | 456          | 448     | 465  | 374          | 350     | 400  | 334           | 308     | 361 | 208                       | 169     | 248                          | 1,68 | 1,51    | 1,87 |
|                   | 1997-2001 | 435          | 426     | 444  | 373          | 351     | 396  | 349           | 325     | 372 | 150                       | 113     | 188                          | 1,49 | 1,35    | 1,65 |
|                   | 2002-2006 | 405          | 396     | 414  | 357          | 338     | 377  | 311           | 292     | 331 | 147                       | 114     | 180                          | 1,52 | 1,38    | 1,67 |
|                   | 2007-2010 | 368          | 358     | 378  | 345          | 325     | 366  | 265           | 248     | 284 | 142                       | 109     | 175                          | 1,53 | 1,38    | 1,70 |
|                   | 2011-2013 | 344          | 331     | 357  | 320          | 299     | 341  | 262           | 244     | 283 | 122                       | 86      | 158                          | 1,45 | 1,28    | 1,63 |
| Spain (national)  |           |              |         |      |              |         |      |               |         |     |                           |         |                              |      |         |      |
|                   |           | Low educated |         |      | Mid educated |         |      | High educated |         |     | Slope Index of Inequality |         | Relative Index of Inequality |      |         |      |
|                   | period    | ASMR         | 95% C.I |      | ASMR         | 95% C.I |      | ASMR          | 95% C.I |     | SII                       | 95% C.I |                              | RII  | 95% C.I |      |
| males             | 2002-2006 | 1021         | 1018    | 1024 | 862          | 854     | 870  | 720           | 712     | 728 | 464                       | 452     | 476                          | 1,78 | 1,75    | 1,81 |
|                   | 2007-2011 | 918          | 915     | 921  | 748          | 742     | 755  | 614           | 608     | 620 | 473                       | 463     | 484                          | 1,89 | 1,86    | 1,92 |
| females           | 2002-2006 | 438          | 437     | 440  | 372          | 366     | 378  | 336           | 329     | 343 | 169                       | 159     | 179                          | 1,56 | 1,52    | 1,60 |
|                   | 2007-2011 | 395          | 393     | 397  | 336          | 331     | 341  | 311           | 305     | 316 | 144                       | 136     | 152                          | 1,52 | 1,48    | 1,56 |

National data for Spain as a whole are only available after 2002, and are based on mortality follow-up of the population enumerated in the 2001 census (See: Regidor E, Vallejo F, Granados JAT, Viciano-Fernandez FJ, de la Fuente L, Barrio G. Mortality decrease according to socioeconomic groups during the economic crisis in Spain: a cohort study of 36 million people. Lancet. 2016;388(10060):2642-52).

**Table S5. Results of interrupted time-series analysis of mortality.**

|                     |                      | Total mortality |             |              | Cardiovascular diseases |            |       | Cancer       |             |              | Other diseases |            |       | External causes |             |              |
|---------------------|----------------------|-----------------|-------------|--------------|-------------------------|------------|-------|--------------|-------------|--------------|----------------|------------|-------|-----------------|-------------|--------------|
|                     |                      | Estimate        | Std. Error  | Sig.         | Estimate                | Std. Error | Sig.  | Estimate     | Std. Error  | Sig.         | Estimate       | Std. Error | Sig.  | Estimate        | Std. Error  | Sig.         |
| Western Europe      | trend 1980-2008      | -1.7%           | 0.1%        | 0.000        | -3.4%                   | 0.2%       | 0.000 | -1.1%        | 0.1%        | 0.000        | -0.4%          | 0.2%       | 0.068 | -0.7%           | 0.3%        | 0.049        |
| Low educated men    | change in trend 2008 | 0.0%            | 0.0%        | 0.252        | -0.1%                   | 0.1%       | 0.074 | -0.1%        | 0.0%        | 0.052        | 0.0%           | 0.1%       | 0.760 | <b>-0.3%</b>    | <b>0.1%</b> | <b>0.009</b> |
| Western Europe      | trend 1980-2008      | -2.7%           | 0.1%        | 0.000        | -4.9%                   | 0.2%       | 0.000 | -1.6%        | 0.1%        | 0.000        | -1.0%          | 0.3%       | 0.004 | -1.8%           | 0.3%        | 0.000        |
| High educated men   | change in trend 2008 | <b>-0.1%</b>    | <b>0.0%</b> | <b>0.027</b> | -0.1%                   | 0.1%       | 0.180 | <b>-0.1%</b> | <b>0.0%</b> | <b>0.006</b> | -0.1%          | 0.1%       | 0.293 | -0.2%           | 0.1%        | 0.254        |
| Western Europe      | trend 1980-2008      | -1.3%           | 0.1%        | 0.000        | -3.7%                   | 0.1%       | 0.000 | -0.4%        | 0.2%        | 0.006        | 0.3%           | 0.2%       | 0.284 | -0.8%           | 0.4%        | 0.084        |
| Low educated women  | change in trend 2008 | 0.0%            | 0.0%        | 0.994        | -0.1%                   | 0.1%       | 0.125 | 0.0%         | 0.1%        | 0.997        | 0.0%           | 0.1%       | 0.971 | <b>-0.3%</b>    | <b>0.2%</b> | <b>0.049</b> |
| Western Europe      | trend 1980-2008      | -2.2%           | 0.1%        | 0.000        | -4.8%                   | 0.2%       | 0.000 | -1.3%        | 0.1%        | 0.000        | -0.7%          | 0.2%       | 0.001 | -2.4%           | 0.4%        | 0.000        |
| High educated women | change in trend 2008 | -0.1%           | 0.1%        | 0.069        | -0.1%                   | 0.1%       | 0.354 | -0.1%        | 0.1%        | 0.087        | -0.2%          | 0.1%       | 0.094 | <b>-0.6%</b>    | <b>0.2%</b> | <b>0.009</b> |
| Eastern Europe      | trend 1980-2008      | -0.1%           | 0.3%        | 0.635        | -0.9%                   | 0.3%       | 0.018 | 0.9%         | 0.2%        | 0.001        | 0.2%           | 0.5%       | 0.714 | -0.4%           | 0.6%        | 0.515        |
| Low educated men    | change in trend 2008 | <b>-0.4%</b>    | <b>0.1%</b> | <b>0.029</b> | -0.3%                   | 0.2%       | 0.060 | <b>-0.5%</b> | <b>0.1%</b> | <b>0.002</b> | -0.3%          | 0.3%       | 0.350 | -0.5%           | 0.3%        | 0.090        |
| Eastern Europe      | trend 1980-2008      | -3.3%           | 0.3%        | 0.000        | -4.6%                   | 0.4%       | 0.000 | -2.1%        | 0.2%        | 0.000        | -2.5%          | 0.6%       | 0.003 | -2.3%           | 0.4%        | 0.001        |
| High educated men   | change in trend 2008 | 0.3%            | 0.2%        | 0.118        | 0.3%                    | 0.2%       | 0.089 | <b>0.2%</b>  | <b>0.1%</b> | <b>0.029</b> | 0.3%           | 0.3%       | 0.332 | -0.2%           | 0.2%        | 0.278        |
| Eastern Europe      | trend 1980-2008      | -0.9%           | 0.3%        | 0.007        | -1.8%                   | 0.3%       | 0.000 | 0.3%         | 0.1%        | 0.008        | -0.2%          | 0.6%       | 0.790 | -1.6%           | 0.5%        | 0.013        |
| Low educated women  | change in trend 2008 | -0.1%           | 0.1%        | 0.364        | -0.2%                   | 0.2%       | 0.243 | -0.1%        | 0.0%        | 0.072        | 0.0%           | 0.3%       | 0.901 | -0.3%           | 0.3%        | 0.248        |
| Eastern Europe      | trend 1980-2008      | -4.0%           | 0.5%        | 0.000        | -5.1%                   | 0.5%       | 0.000 | -2.7%        | 0.4%        | 0.000        | -3.2%          | 0.7%       | 0.002 | -6.3%           | 0.6%        | 0.000        |
| High educated women | change in trend 2008 | 0.4%            | 0.2%        | 0.112        | 0.2%                    | 0.2%       | 0.332 | 0.3%         | 0.2%        | 0.072        | 0.3%           | 0.3%       | 0.309 | 0.3%            | 0.3%        | 0.293        |

**Table S5. Results of interrupted time-series analysis of mortality (continued).**

|                     |                      | Smoking-related mortality |             |              | Alcohol-related mortality |             |              | Amenable mortality |             |              | Road traffic injuries |             |              | Suicide  |            |       |
|---------------------|----------------------|---------------------------|-------------|--------------|---------------------------|-------------|--------------|--------------------|-------------|--------------|-----------------------|-------------|--------------|----------|------------|-------|
|                     |                      | Estimate                  | Std. Error  | Sig.         | Estimate                  | Std. Error  | Sig.         | Estimate           | Std. Error  | Sig.         | Estimate              | Std. Error  | Sig.         | Estimate | Std. Error | Sig.  |
| Western Europe      | trend 1980-2008      | -1.4%                     | 0.3%        | 0.000        | 2.2%                      | 0.5%        | 0.000        | -2.4%              | 0.2%        | 0.000        | -2.5%                 | 0.4%        | 0.000        | -0.8%    | 0.5%       | 0.097 |
| Low educated men    | change in trend 2008 | 0.0%                      | 0.1%        | 0.681        | <b>-0.7%</b>              | <b>0.2%</b> | <b>0.001</b> | 0.0%               | 0.1%        | 0.775        | <b>-0.6%</b>          | <b>0.2%</b> | <b>0.005</b> | -0.3%    | 0.2%       | 0.104 |
| Western Europe      | trend 1980-2008      | -2.6%                     | 0.3%        | 0.000        | 1.1%                      | 0.8%        | 0.181        | -3.2%              | 0.1%        | 0.000        | -3.3%                 | 0.6%        | 0.000        | -2.1%    | 0.6%       | 0.003 |
| High educated men   | change in trend 2008 | -0.1%                     | 0.1%        | 0.139        | <b>-0.6%</b>              | <b>0.3%</b> | <b>0.048</b> | <b>-0.2%</b>       | <b>0.1%</b> | <b>0.021</b> | -0.6%                 | 0.3%        | 0.059        | 0.1%     | 0.3%       | 0.734 |
| Western Europe      | trend 1980-2008      | 2.8%                      | 0.4%        | 0.000        | 3.5%                      | 0.6%        | 0.000        | -2.6%              | 0.2%        | 0.000        | -3.4%                 | 0.7%        | 0.000        | -1.3%    | 0.4%       | 0.004 |
| Low educated women  | change in trend 2008 | -0.1%                     | 0.1%        | 0.378        | <b>-0.5%</b>              | <b>0.2%</b> | <b>0.016</b> | 0.1%               | 0.1%        | 0.410        | <b>-1.4%</b>          | <b>0.4%</b> | <b>0.002</b> | -0.1%    | 0.2%       | 0.718 |
| Western Europe      | trend 1980-2008      | 0.5%                      | 0.3%        | 0.067        | 3.2%                      | 1.3%        | 0.023        | -3.2%              | 0.2%        | 0.000        | -5.1%                 | 0.6%        | 0.000        | -2.9%    | 0.6%       | 0.000 |
| High educated women | change in trend 2008 | -0.1%                     | 0.2%        | 0.479        | -0.6%                     | 0.4%        | 0.136        | 0.0%               | 0.1%        | 0.636        | -0.5%                 | 0.3%        | 0.075        | -0.4%    | 0.3%       | 0.110 |
| Eastern Europe      | trend 1980-2008      | 0.4%                      | 0.4%        | 0.353        | 10.6%                     | 4.0%        | 0.024        | -0.7%              | 0.3%        | 0.039        | -2.8%                 | 0.6%        | 0.003        | 6.1%     | 3.2%       | 0.091 |
| Low educated men    | change in trend 2008 | -0.4%                     | 0.2%        | 0.102        | -1.9%                     | 2.1%        | 0.386        | -0.2%              | 0.2%        | 0.176        | -0.6%                 | 0.3%        | 0.102        | -1.5%    | 1.8%       | 0.418 |
| Eastern Europe      | trend 1980-2008      | -2.1%                     | 0.4%        | 0.000        | 7.3%                      | 3.2%        | 0.046        | -3.9%              | 0.4%        | 0.000        | -3.1%                 | 1.0%        | 0.013        | 0.7%     | 2.6%       | 0.803 |
| High educated men   | change in trend 2008 | 0.2%                      | 0.2%        | 0.396        | -0.8%                     | 1.5%        | 0.624        | <b>0.5%</b>        | <b>0.2%</b> | <b>0.044</b> | <b>-1.0%</b>          | <b>0.4%</b> | <b>0.047</b> | -0.7%    | 1.3%       | 0.615 |
| Eastern Europe      | trend 1980-2008      | 2.1%                      | 0.4%        | 0.000        | 10.9%                     | 4.3%        | 0.031        | -1.8%              | 0.3%        | 0.000        | -3.2%                 | 1.5%        | 0.063        | 3.0%     | 3.2%       | 0.380 |
| Low educated women  | change in trend 2008 | 0.2%                      | 0.2%        | 0.281        | -1.7%                     | 2.3%        | 0.489        | -0.1%              | 0.2%        | 0.560        | -0.5%                 | 0.8%        | 0.557        | -1.7%    | 1.8%       | 0.368 |
| Eastern Europe      | trend 1980-2008      | -2.1%                     | 0.5%        | 0.003        | 9.4%                      | 5.1%        | 0.109        | -4.5%              | 0.6%        | 0.000        | -5.5%                 | 0.9%        | 0.000        | -4.8%    | 2.8%       | 0.122 |
| High educated women | change in trend 2008 | <b>0.6%</b>               | <b>0.2%</b> | <b>0.031</b> | -2.2%                     | 1.3%        | 0.125        | 0.4%               | 0.3%        | 0.112        | -0.3%                 | 0.4%        | 0.396        | 0.3%     | 1.2%       | 0.841 |

**Table S5. Results of interrupted time-series analysis of mortality (continued).**

|                     |                      | 35-39        |             |              | 40-44        |             |              | 45-49        |             |              | 50-54        |             |              | 55-59        |             |              |
|---------------------|----------------------|--------------|-------------|--------------|--------------|-------------|--------------|--------------|-------------|--------------|--------------|-------------|--------------|--------------|-------------|--------------|
|                     |                      | Estimate     | Std. Error  | Sig.         |
| Western Europe      | trend 1980-2008      | -0.5%        | 0.6%        | 0.416        | -1.1%        | 0.3%        | 0.002        | -0.9%        | 0.2%        | 0.000        | -1.2%        | 0.2%        | 0.000        | -1.5%        | 0.2%        | 0.000        |
| Low educated men    | change in trend 2008 | -0.1%        | 0.2%        | 0.491        | <b>-0.4%</b> | <b>0.1%</b> | <b>0.002</b> | <b>-0.2%</b> | <b>0.1%</b> | <b>0.042</b> | -0.1%        | 0.1%        | 0.107        | 0.0%         | 0.1%        | 0.496        |
| Western Europe      | trend 1980-2008      | -2.5%        | 0.6%        | 0.000        | -3.0%        | 0.5%        | 0.000        | -2.3%        | 0.3%        | 0.000        | -2.5%        | 0.2%        | 0.000        | -2.5%        | 0.3%        | 0.000        |
| High educated men   | change in trend 2008 | -0.3%        | 0.3%        | 0.273        | -0.2%        | 0.1%        | 0.167        | <b>-0.4%</b> | <b>0.2%</b> | <b>0.019</b> | <b>-0.3%</b> | <b>0.1%</b> | <b>0.033</b> | -0.1%        | 0.1%        | 0.162        |
| Western Europe      | trend 1980-2008      | 0.1%         | 0.4%        | 0.847        | -0.4%        | 0.4%        | 0.365        | 0.1%         | 0.3%        | 0.814        | -0.2%        | 0.3%        | 0.550        | -0.6%        | 0.3%        | 0.018        |
| Low educated women  | change in trend 2008 | <b>-0.5%</b> | <b>0.2%</b> | <b>0.013</b> | -0.2%        | 0.1%        | 0.087        | -0.2%        | 0.2%        | 0.315        | -0.2%        | 0.1%        | 0.125        | 0.1%         | 0.1%        | 0.477        |
| Western Europe      | trend 1980-2008      | -2.4%        | 0.4%        | 0.000        | -2.8%        | 0.4%        | 0.000        | -2.1%        | 0.2%        | 0.000        | -1.4%        | 0.3%        | 0.000        | -1.4%        | 0.2%        | 0.000        |
| High educated women | change in trend 2008 | -0.4%        | 0.2%        | 0.069        | -0.3%        | 0.2%        | 0.180        | <b>-0.3%</b> | <b>0.1%</b> | <b>0.020</b> | <b>-0.3%</b> | <b>0.1%</b> | <b>0.014</b> | <b>-0.3%</b> | <b>0.1%</b> | <b>0.017</b> |
| Eastern Europe      | trend 1980-2008      | -1.5%        | 1.0%        | 0.160        | -0.1%        | 0.8%        | 0.882        | 0.7%         | 0.5%        | 0.196        | 0.8%         | 0.3%        | 0.034        | 0.8%         | 0.3%        | 0.033        |
| Low educated men    | change in trend 2008 | -0.5%        | 0.5%        | 0.373        | -0.8%        | 0.4%        | 0.067        | <b>-0.9%</b> | <b>0.3%</b> | <b>0.011</b> | <b>-0.6%</b> | <b>0.2%</b> | <b>0.007</b> | <b>-0.5%</b> | <b>0.2%</b> | <b>0.011</b> |
| Eastern Europe      | trend 1980-2008      | -2.8%        | 0.8%        | 0.006        | -2.3%        | 0.8%        | 0.027        | -1.5%        | 0.2%        | 0.000        | -2.3%        | 0.4%        | 0.001        | -2.7%        | 0.5%        | 0.000        |
| High educated men   | change in trend 2008 | <b>-1.2%</b> | <b>0.4%</b> | <b>0.008</b> | -0.5%        | 0.4%        | 0.182        | <b>-0.7%</b> | <b>0.1%</b> | <b>0.000</b> | -0.2%        | 0.2%        | 0.332        | -0.1%        | 0.2%        | 0.693        |
| Eastern Europe      | trend 1980-2008      | -0.6%        | 0.8%        | 0.475        | 0.9%         | 0.7%        | 0.234        | 1.1%         | 0.6%        | 0.105        | 1.0%         | 0.5%        | 0.069        | 0.3%         | 0.5%        | 0.627        |
| Low educated women  | change in trend 2008 | -0.7%        | 0.4%        | 0.156        | <b>-1.0%</b> | <b>0.4%</b> | <b>0.020</b> | -0.7%        | 0.3%        | 0.056        | -0.4%        | 0.2%        | 0.106        | -0.2%        | 0.3%        | 0.520        |
| Eastern Europe      | trend 1980-2008      | -2.4%        | 0.9%        | 0.025        | -4.1%        | 0.6%        | 0.000        | -2.7%        | 0.3%        | 0.000        | -3.5%        | 0.4%        | 0.000        | -3.9%        | 0.4%        | 0.000        |
| High educated women | change in trend 2008 | -0.7%        | 0.3%        | 0.065        | 0.2%         | 0.2%        | 0.403        | -0.2%        | 0.2%        | 0.184        | 0.0%         | 0.2%        | 0.995        | 0.4%         | 0.2%        | 0.061        |



**Table S5. Results of interrupted time-series analysis of mortality (continued).**

|                     |                      | 60-64        |             |              | 65-69        |             |              | 70-74        |             |              | 75-79        |             |              |
|---------------------|----------------------|--------------|-------------|--------------|--------------|-------------|--------------|--------------|-------------|--------------|--------------|-------------|--------------|
|                     |                      | Estimate     | Std. Error  | Sig.         |
| Western Europe      | trend 1980-2008      | -1.8%        | 0.2%        | 0.000        | -2.1%        | 0.1%        | 0.000        | -2.1%        | 0.1%        | 0.000        | -1.9%        | 0.1%        | 0.000        |
| Low educated men    | change in trend 2008 | <b>0.1%</b>  | <b>0.1%</b> | <b>0.029</b> | 0.1%         | 0.1%        | 0.171        | 0.0%         | 0.0%        | 0.344        | -0.1%        | 0.1%        | 0.057        |
| Western Europe      | trend 1980-2008      | -2.8%        | 0.2%        | 0.000        | -3.1%        | 0.2%        | 0.000        | -2.9%        | 0.2%        | 0.000        | -2.5%        | 0.1%        | 0.000        |
| High educated men   | change in trend 2008 | 0.0%         | 0.1%        | 0.733        | 0.0%         | 0.1%        | 0.581        | 0.0%         | 0.1%        | 0.916        | <b>-0.2%</b> | <b>0.1%</b> | <b>0.007</b> |
| Western Europe      | trend 1980-2008      | -1.2%        | 0.2%        | 0.000        | -1.8%        | 0.2%        | 0.000        | -1.9%        | 0.2%        | 0.000        | -1.8%        | 0.2%        | 0.000        |
| Low educated women  | change in trend 2008 | <b>0.2%</b>  | <b>0.1%</b> | <b>0.027</b> | <b>0.2%</b>  | <b>0.1%</b> | <b>0.005</b> | 0.0%         | 0.1%        | 0.700        | 0.0%         | 0.1%        | 0.706        |
| Western Europe      | trend 1980-2008      | -2.0%        | 0.2%        | 0.000        | -2.1%        | 0.2%        | 0.000        | -2.7%        | 0.2%        | 0.000        | -2.0%        | 0.2%        | 0.000        |
| High educated women | change in trend 2008 | -0.1%        | 0.1%        | 0.540        | 0.0%         | 0.1%        | 0.717        | 0.1%         | 0.1%        | 0.334        | -0.1%        | 0.1%        | 0.238        |
| Eastern Europe      | trend 1980-2008      | 0.2%         | 0.3%        | 0.527        | 0.2%         | 0.2%        | 0.398        | -0.3%        | 0.2%        | 0.103        | -0.6%        | 0.1%        | 0.001        |
| Low educated men    | change in trend 2008 | <b>-0.3%</b> | <b>0.1%</b> | <b>0.046</b> | <b>-0.3%</b> | <b>0.1%</b> | <b>0.009</b> | <b>-0.3%</b> | <b>0.1%</b> | <b>0.003</b> | <b>-0.2%</b> | <b>0.1%</b> | <b>0.021</b> |
| Eastern Europe      | trend 1980-2008      | -3.2%        | 0.3%        | 0.000        | -2.7%        | 0.2%        | 0.000        | -3.3%        | 0.2%        | 0.000        | -2.8%        | 0.3%        | 0.000        |
| High educated men   | change in trend 2008 | 0.2%         | 0.1%        | 0.135        | 0.1%         | 0.1%        | 0.254        | <b>0.4%</b>  | <b>0.1%</b> | <b>0.002</b> | 0.2%         | 0.1%        | 0.219        |
| Eastern Europe      | trend 1980-2008      | -0.9%        | 0.3%        | 0.020        | -0.8%        | 0.3%        | 0.033        | -1.6%        | 0.2%        | 0.000        | -1.3%        | 0.1%        | 0.000        |
| Low educated women  | change in trend 2008 | 0.1%         | 0.2%        | 0.385        | -0.1%        | 0.2%        | 0.592        | -0.1%        | 0.1%        | 0.416        | <b>-0.2%</b> | <b>0.1%</b> | <b>0.010</b> |
| Eastern Europe      | trend 1980-2008      | -3.6%        | 0.4%        | 0.000        | -2.8%        | 0.5%        | 0.000        | -3.1%        | 0.4%        | 0.000        | -2.4%        | 0.6%        | 0.005        |
| High educated women | change in trend 2008 | 0.2%         | 0.2%        | 0.455        | -0.1%        | 0.2%        | 0.767        | 0.1%         | 0.2%        | 0.481        | -0.2%        | 0.3%        | 0.553        |

Percent annual change as estimated in interrupted time-series analyses (trend 1980-2008 based on  $\beta_1$ , change in trend after 2008 based on  $\beta_2$ ; see Data and methods section for details). In bold:  $\beta_2$  statistically significantly ( $p < .05$ ) different from 0. For distinction between Western and Eastern Europe, see Supplementary table S1.

**Table S6. Results of interrupted time-series analysis of less-than-good self-assessed health and activity limitations.**

|                       |      |                      | Low educated men |             |              | High educated men |            |       | Low educated women |            |       | High educated women |            |       |
|-----------------------|------|----------------------|------------------|-------------|--------------|-------------------|------------|-------|--------------------|------------|-------|---------------------|------------|-------|
|                       |      |                      | Estimate         | Std. Error  | Sig.         | Estimate          | Std. Error | Sig.  | Estimate           | Std. Error | Sig.  | Estimate            | Std. Error | Sig.  |
| Western Europe        | SAH  | Trend 2002-08        | -1.5%            | 0.5%        | 0.001        | -2.7%             | 0.7%       | 0.000 | -0.7%              | 0.4%       | 0.122 | -2.0%               | 0.7%       | 0.004 |
|                       |      | Change in trend 2008 | 0.4%             | 0.2%        | 0.057        | 0.7%              | 0.4%       | 0.066 | 0.3%               | 0.2%       | 0.128 | 0.0%                | 0.3%       | 0.970 |
|                       | GALI | Trend 2002-08        | 1.4%             | 0.7%        | 0.037        | 1.6%              | 1.0%       | 0.109 | 2.4%               | 0.7%       | 0.000 | 0.9%                | 1.0%       | 0.347 |
|                       |      | Change in trend 2008 | -0.2%            | 0.4%        | 0.588        | -0.1%             | 0.5%       | 0.800 | -0.4%              | 0.3%       | 0.219 | 0.0%                | 0.5%       | 0.967 |
| Eastern Europe        | SAH  | Trend 2002-08        | -1.2%            | 0.4%        | 0.003        | -2.5%             | 0.8%       | 0.002 | -1.6%              | 0.4%       | 0.000 | -3.2%               | 0.7%       | 0.000 |
|                       |      | Change in trend 2008 | <b>-0.5%</b>     | <b>0.2%</b> | <b>0.006</b> | -0.3%             | 0.4%       | 0.416 | -0.1%              | 0.2%       | 0.414 | 0.0%                | 0.3%       | 0.973 |
|                       | GALI | Trend 2002-08        | 1.9%             | 1.0%        | 0.075        | 1.1%              | 1.7%       | 0.518 | 0.5%               | 1.4%       | 0.705 | 0.8%                | 1.9%       | 0.682 |
|                       |      | Change in trend 2008 | -0.7%            | 0.5%        | 0.144        | -0.2%             | 0.9%       | 0.796 | 0.6%               | 0.7%       | 0.360 | 0.2%                | 0.9%       | 0.861 |
| Five crisis countries | SAH  | Trend 2002-08        | -1.7%            | 0.8%        | 0.030        | -3.2%             | 1.6%       | 0.055 | -1.4%              | 0.8%       | 0.075 | -2.2%               | 1.5%       | 0.150 |
|                       |      | Change in trend 2008 | <b>0.8%</b>      | <b>0.3%</b> | <b>0.022</b> | 1.3%              | 0.8%       | 0.119 | 0.5%               | 0.4%       | 0.215 | 0.1%                | 0.8%       | 0.915 |
|                       | GALI | Trend 2002-08        | 0.1%             | 1.1%        | 0.920        | 0.0%              | 2.0%       | 0.981 | 0.3%               | 1.1%       | 0.773 | -1.7%               | 2.0%       | 0.402 |
|                       |      | Change in trend 2008 | -0.2%            | 0.6%        | 0.763        | 0.1%              | 1.1%       | 0.950 | -0.4%              | 0.6%       | 0.548 | 0.6%                | 1.0%       | 0.553 |

Percent annual change as estimated in interrupted time-series analyses (trend 2002-2008 based on  $\beta_1$ , change in trend after 2008 based on  $\beta_2$ ; see Data and methods section for details). In bold:  $\beta_2$  statistically significantly ( $p < .05$ ) different from 0. For distinction between Western and Eastern Europe, see Supplementary table S1.

**Table S7. Relationship between crisis-related variables and mortality, less-than-good self-assessed health and activity limitations, by education, women**

| Independent variable       | Control variables                | Education | Mortality     |               |               | Self-assessed health |               |               | Activity limitations |               |               |
|----------------------------|----------------------------------|-----------|---------------|---------------|---------------|----------------------|---------------|---------------|----------------------|---------------|---------------|
|                            |                                  |           | Estimate      | 95% CI        |               | Estimate             | 95% CI        |               | Estimate             | 95% CI        |               |
|                            |                                  |           |               | Lower         | Upper         |                      | Lower         | Upper         |                      | Lower         | Upper         |
| national income (ln)       | country, period, (survey)        | Low       | <b>-0.190</b> | <b>-0.264</b> | <b>-0.115</b> | <b>-0.175</b>        | <b>-0.304</b> | <b>-0.046</b> | <b>0.309</b>         | <b>0.065</b>  | <b>0.553</b>  |
| national income (ln)       | country, period, (survey)        | High      | <b>-0.290</b> | <b>-0.442</b> | <b>-0.138</b> | <b>-0.340</b>        | <b>-0.541</b> | <b>-0.140</b> | 0.272                | -0.082        | 0.627         |
| unemployment (%)           | country, period, (survey,) lnGDP | Low       | <b>-0.007</b> | <b>-0.012</b> | <b>-0.003</b> | <b>-0.005</b>        | <b>-0.010</b> | <b>-0.001</b> | -0.002               | -0.010        | 0.006         |
| unemployment (%)           | country, period, (survey,) lnGDP | High      | <b>-0.005</b> | <b>-0.011</b> | <b>0.001</b>  | <b>-0.007</b>        | <b>-0.014</b> | <b>0.000</b>  | <b>-0.013</b>        | <b>-0.025</b> | <b>0.000</b>  |
| mat deprivation (%)        | country, period, (survey,) lnGDP | Low       | -0.243        | -0.669        | 0.183         | <b>0.229</b>         | <b>0.036</b>  | <b>0.423</b>  | 0.269                | -0.110        | 0.649         |
| mat deprivation (%)        | country, period, (survey,) lnGDP | High      | <b>-0.677</b> | <b>-1.322</b> | <b>-0.031</b> | 0.042                | -0.368        | 0.452         | <b>-0.861</b>        | <b>-1.590</b> | <b>-0.131</b> |
| social transfers (% GDP)   | country, period, (survey,) lnGDP | Low       | -0.001        | -0.008        | 0.006         | <b>-0.016</b>        | <b>-0.027</b> | <b>-0.004</b> | 0.013                | -0.009        | 0.035         |
| social transfers (% GDP)   | country, period, (survey,) lnGDP | High      | -0.007        | -0.016        | 0.002         | <b>-0.019</b>        | <b>-0.037</b> | <b>-0.001</b> | 0.007                | -0.025        | 0.039         |
| health expenditure (% GDP) | country, period, (survey,) lnGDP | Low       | -0.024        | -0.054        | 0.005         | 0.000                | -0.024        | 0.025         | 0.006                | -0.042        | 0.053         |
| health expenditure (% GDP) | country, period, (survey,) lnGDP | High      | <b>-0.034</b> | <b>-0.063</b> | <b>-0.006</b> | -0.032               | -0.070        | 0.007         | -0.016               | -0.084        | 0.053         |
| out-of-pocket expenses (%) | country, period, (survey,) lnGDP | Low       | 0.003         | -0.007        | 0.013         | 0.000                | -0.005        | 0.006         | 0.002                | -0.010        | 0.014         |
| out-of-pocket expenses (%) | country, period, (survey,) lnGDP | High      | 0.004         | -0.007        | 0.016         | -0.006               | -0.015        | 0.004         | -0.006               | -0.023        | 0.011         |

All dependent variables were log transformed. Multilevel model with correction for serial autocorrelation, stratified by gender and level of education. All determinants are national averages, with the exception of material deprivation which was available for low and high educated men and women separately.

### Box S1. Details on the regression analyses.

In order to quantify changes over time in mortality and self-reported morbidity and to assess whether a recent change in trend has occurred we conducted interrupted time-series analyses in which mortality and self-reported morbidity were modelled as a function of time, in the following way:

$$\text{LnM}_{ct} = \alpha + \beta_1 * T + \beta_2 * T * A_t + \varepsilon$$

in which Ln = natural logarithm, M = age-standardized mortality or self-reported morbidity rate, T = linear variable for calendar-year, A = dummy variable with values 0 and 1 before and after 2008,  $\alpha$  = intercept,  $\beta_1$  = parameter indicating the change in LnM associated with one unit increase in T,  $\beta_2$  = parameter indicating the change in trend of LnM after 2008,  $\varepsilon$  = error term, c = subscript denoting country, and t = subscript denoting calendar-year. We only modelled a gradual change in trend, because we did not expect sudden level changes in the health outcomes.

In order to more directly analyse the association between changes over time in health outcomes and the crisis we conducted panel (or pooled cross-sectional time series) analyses in which health outcomes were modelled as a function of crisis-related economic variables, in the following way:

$$\text{LnM}_{ct} = \alpha + \beta_1 * C + \beta_2 * P + \beta_3 * E_{ct} + \varepsilon$$

in which Ln = natural logarithm, M = age-standardized mortality or self-reported morbidity rate, C = a set of dummy variables representing country fixed effects, P = a set of dummy variables representing period fixed effects, E = economic variable,  $\alpha$  = intercept,  $\beta_1$  and  $\beta_2$  = parameters indicating differences in levels of LnM between countries and periods,  $\beta_3$  = parameter indicating effect of economic variable on LnM,  $\varepsilon$  = error term, c = subscript denoting country, and t = subscript denoting calendar-year. This analytical technique (with fixed effects for country and period) removes confounding by unmeasured country characteristics and unmeasured trends in background factors, and essentially quantifies the effect of a change in the economic variables on mortality or self-reported morbidity, net of other influences.

For self-assessed health and activity limitations we present results obtained in a dataset in which the age-standardized morbidity rates of ESS and EU-SILC were pooled. The main reason for taking the two surveys together is that pooling allows us to combine the strengths of both surveys: while EU-SILC has the highest number of respondents, ESS for many countries covers a longer time-period and has been more strictly

harmonized. To take into account differences between the surveys in levels of self-reported morbidity we added an additional dummy variable representing survey to our regression models.

All regression analyses were conducted for men and women and for the low and high educated separately, because preliminary analyses indicated that the effects of main and control variables often differed between these strata. In order to take into account heteroskedasticity, analyses of mortality were weighted by the square root of the number of deaths, and analyses of survey data by the number of respondents in the survey. Please note that because of the logarithmic transformation we quantify relative, not absolute, changes in mortality and self-reported morbidity, and relative, not absolute, effects of economic variables on mortality and self-reported morbidity.

All regression analyses were done with the SPSS 24 routine for linear mixed models. This allowed us to apply a multilevel framework and thus to take into account dependency of data within countries and (when using the pooled ESS-EU-SILC dataset) within surveys. We also used an autoregressive model of order 1 (AR(1)) to take into account the serial autocorrelation in the mortality and morbidity rates.

### **Box S1. Acknowledgements relating to data acquisition**

We gratefully acknowledge the contribution of the following persons to data collection: Prof. Giuseppe Costa (Department of Clinical Medicine and Biology, University of Turin, Italy), Dr. Johannes Klotz (Statistics Austria, Vienna, Austria), Prof. Olle Lundberg (Center for Health Equity Studies, Stockholm, Sweden), Bjørn Heine Strand (Division of Epidemiology, Norwegian Institute of Public Health, Oslo, Norway)

The permission of the Office for National Statistics to use the Longitudinal Study is gratefully acknowledged, as is the help provided by staff of the Centre for Longitudinal Study Information & User Support (CeLSIUS). CeLSIUS is supported by the ESRC Census of Population Programme (Award Ref: ES/K000365/1). The authors alone are responsible for the interpretation of the data. This work contains statistical data from ONS which is Crown Copyright. The use of the ONS statistical data in this work does not imply the endorsement of the ONS in relation to the interpretation or analysis of the statistical data. This work uses research datasets which may not exactly reproduce National Statistics aggregates.

The mortality data for Switzerland were obtained from the Swiss National Cohort, which is based on mortality and census data provided by the Federal Statistical Office and supported by the Swiss National Science Foundation (grant nos. 3347CO-108806, 33CS30\_134273 and 33CS30\_148415).

The following data from the European Social Survey were used: ESS Round 1: European Social Survey Round 1 Data (2002). Data file edition 6.5. ESS Round 2: European Social Survey Round 2 Data (2004). Data file edition 3.5. ESS Round 3: European Social Survey Round 3 Data (2006). Data file edition 3.6. ESS Round 4: European Social Survey Round 4 Data (2008). Data file edition 4.4. ESS Round 5: European Social Survey Round 5 Data (2010). Data file edition 3.3. ESS Round 6: European Social Survey Round 6 Data (2012). Data file edition 2.3. ESS Round 7: European Social Survey Round 7 Data (2014). Data file edition 2.1. NSD - Norwegian Centre for Research Data, Norway – Data Archive and distributor of ESS data for ESS ERIC.

This study is based on data from Eurostat, European Union Statistics on Income and Living Conditions survey, reference years 2004-2014. The responsibility for all conclusions drawn from the data lies entirely with the authors.
